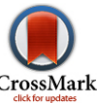

## Correction

# Correction: Sonochemical Effects on 14 Flavonoids Common in Citrus: Relation to Stability

**The PLOS ONE Staff**

There is an error in the author contributions. The first two authors, Liping Qiao and Yujing Sun, should be noted as contributing equally to this work.

**Reference**

1. Qiao L, Sun Y, Chen R, Fu Y, Zhang W, et al. (2014) Sonochemical Effects on 14 Flavonoids Common in Citrus: Relation to Stability. PLoS ONE 9(2): e87766. doi:10.1371/journal.pone.0087766

**Citation:** The PLOS ONE Staff (2014) Correction: Sonochemical Effects on 14 Flavonoids Common in Citrus: Relation to Stability. PLoS ONE 9(8): e105647. doi:10.1371/journal.pone.0105647

**Published:** August 8, 2014

**Copyright:** © 2014 The PLOS ONE Staff. This is an open-access article distributed under the terms of the Creative Commons Attribution License, which permits unrestricted use, distribution, and reproduction in any medium, provided the original author and source are credited.
